# Supplementary figures and images for: A novel 3D-CB/HEC–CH@Cu hybrid electrode for sensitive and rapid ammonia nitrogen detection in environmental water
Source: Royal Society of Chemistry journal article supplement (doi:10.1039/d5ay01860a), 2026-01-01

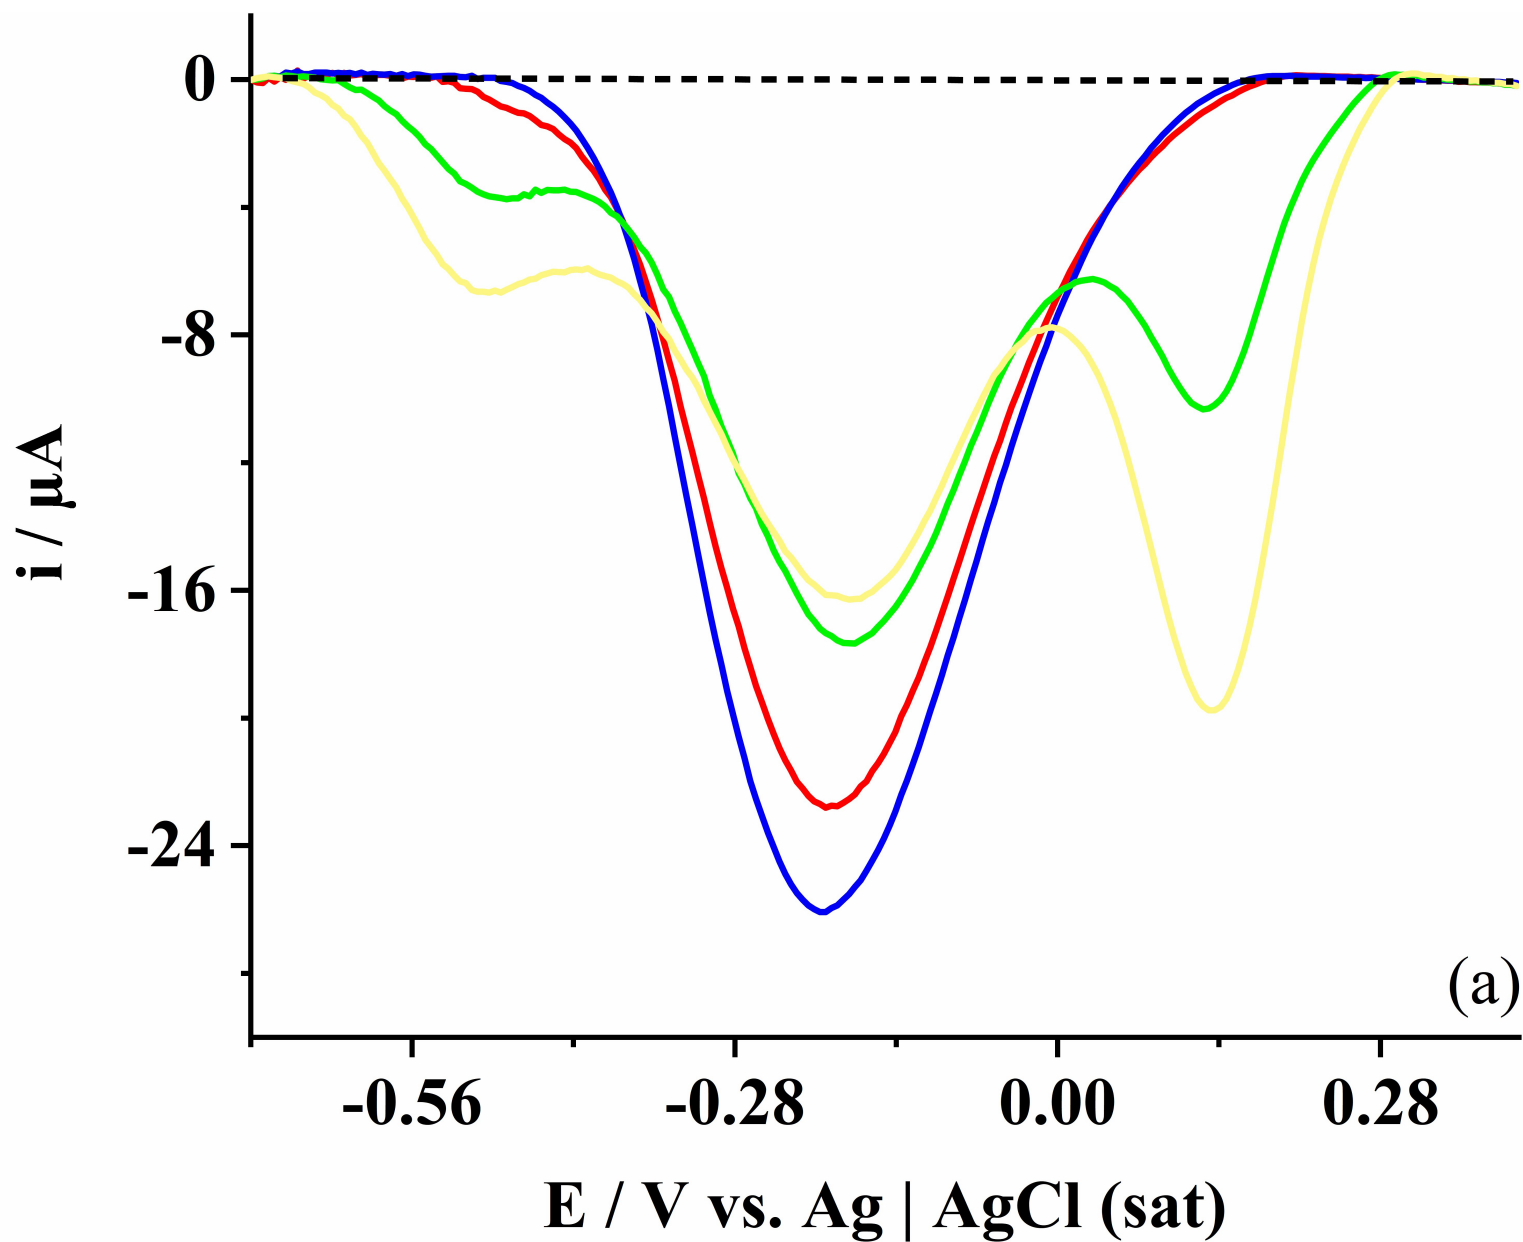

Supplement: d5ay01860a2.pdf [file d5ay01860a2.pdf]

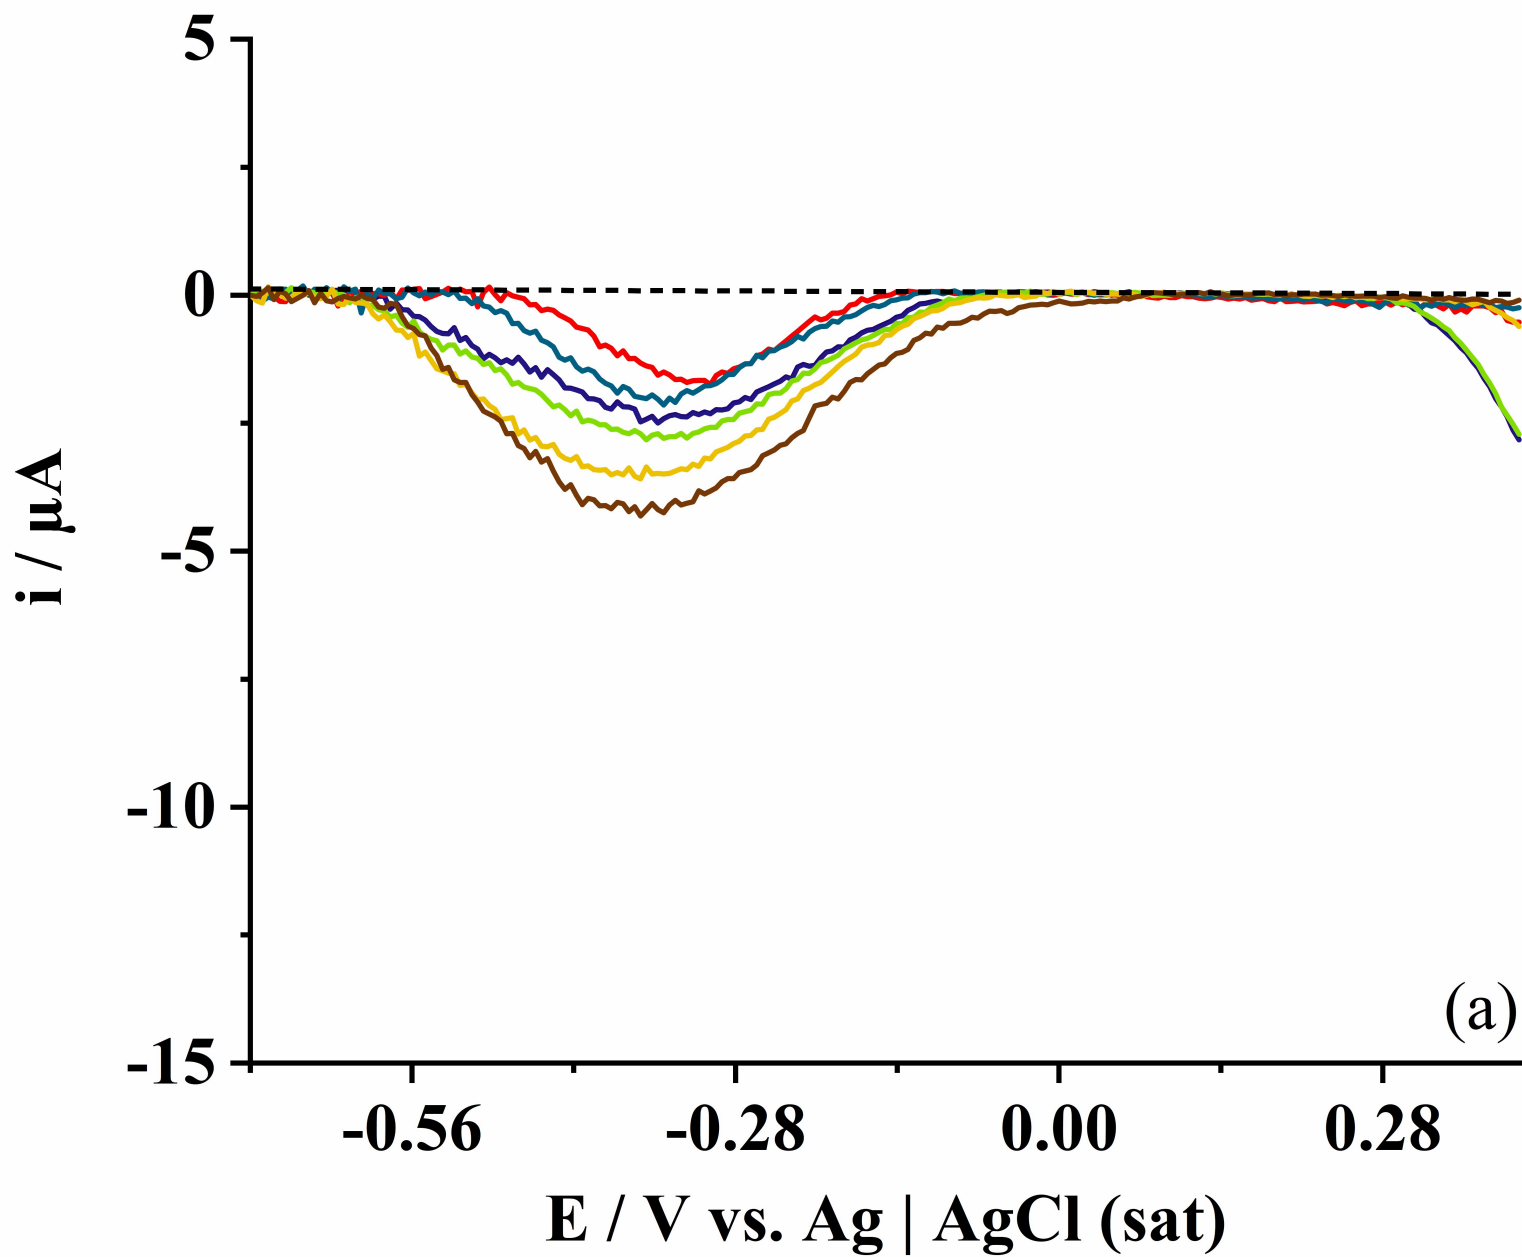

Supplement: d5ay01860a4.pdf [file d5ay01860a4.pdf]

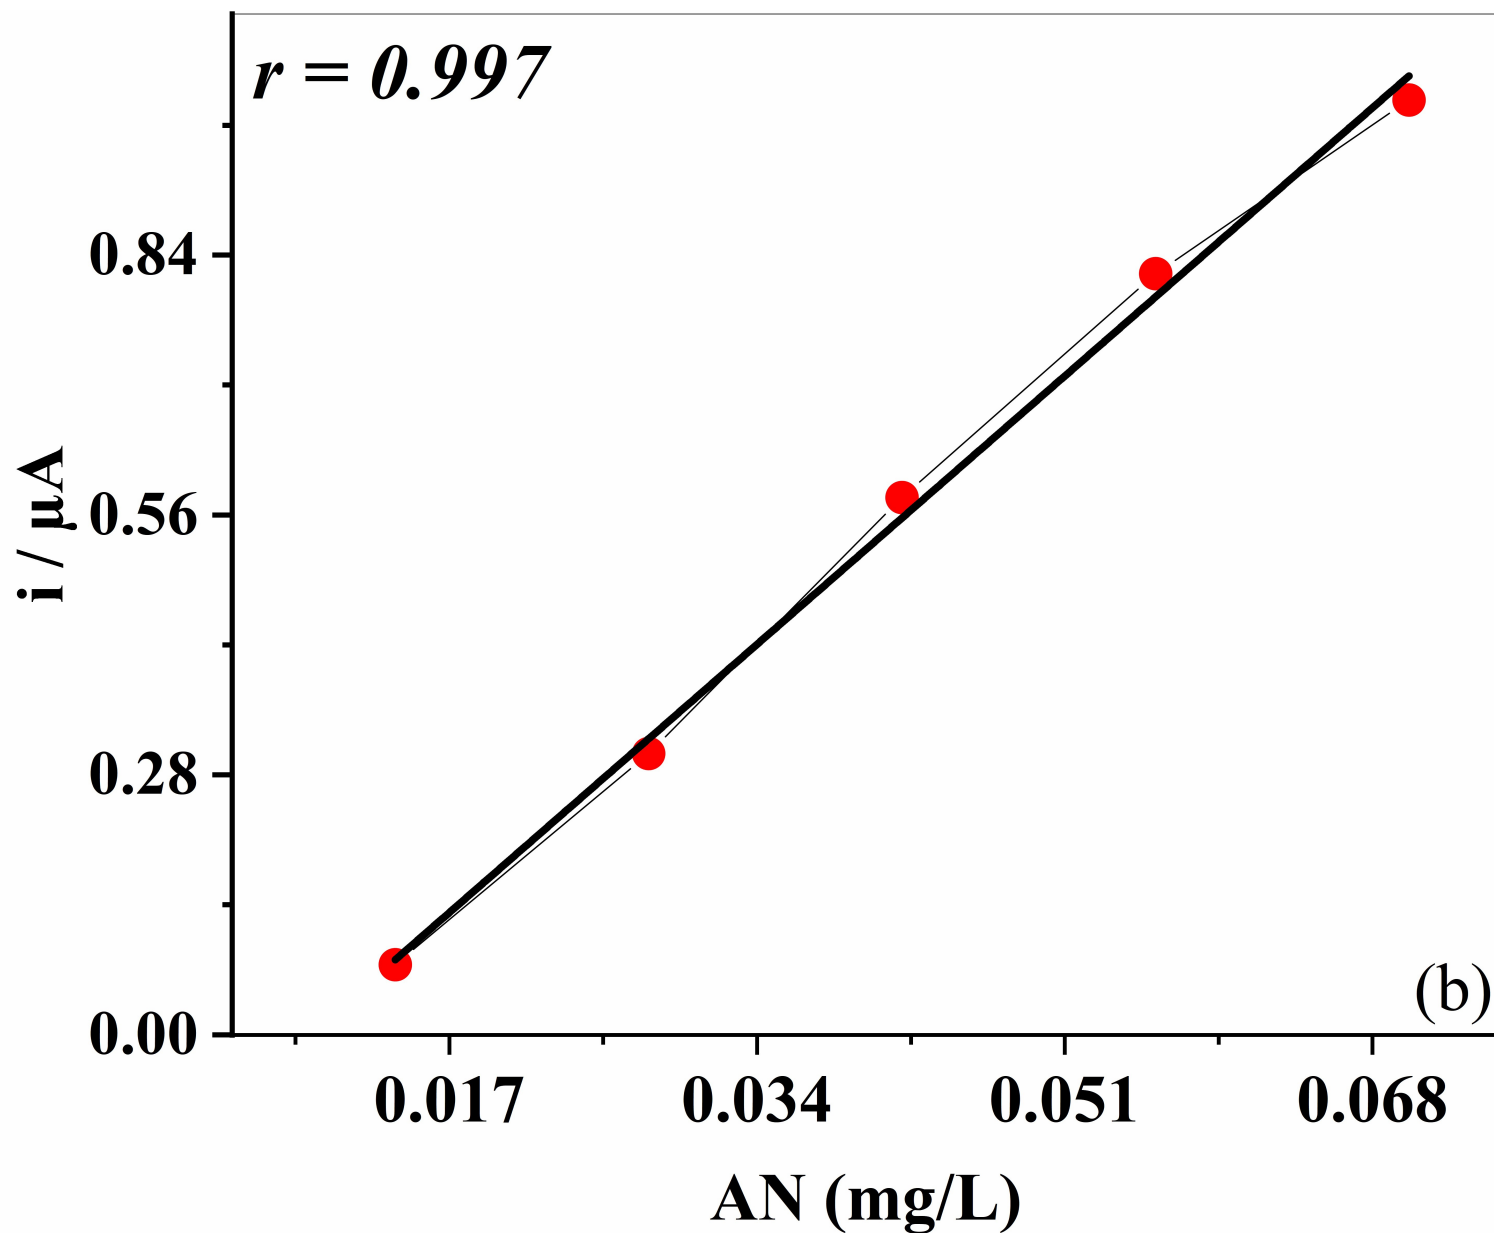

Supplement: d5ay01860a5.pdf [file d5ay01860a5.pdf]
